# Supplementary material
Source: PubMed Central journal article supplement (PMC1560357)
Supplement: 7601291s4.pdf [file 7601291s4.pdf]

**Supplementary Table S2.**

The genes differentially expressed between B05-1(+tet) and B05-1(-tet) cells, categorized into the three groups

| DNA Repair                                                                      |             |
|---------------------------------------------------------------------------------|-------------|
| Description                                                                     | Fold change |
| excision repair 1; ercc1                                                        | 1.9 down    |
| UV radiation resistance-associated gene ; uvrag                                 | 2.4 up      |
| similar to dna polymerase beta                                                  | 2.9 up      |
| Cell cycle                                                                      |             |
| Description                                                                     | Fold        |
| fbj osteosarcoma oncogene b; fosb                                               | 3.2 down    |
| myeloblastosis proto-oncogene product; myb                                      | 2.9 down    |
| regulator of g-protein signaling 2; rgs2                                        | 2.9 down    |
| fibroblast growth factor 7; fgf7                                                | 2.2 down    |
| caltractin, 20 kda calcium binding protein; cctn2                               | 2.0 down    |
| cell division cycle 6 homolog (s. cerevisiae); cdc6                             | 1.9 down    |
| host cell factor c1; hcfc1                                                      | 1.9 down    |
| growth arrest specific 2; gas2                                                  | 1.9 down    |
| cyclin d1; ccnd1                                                                | 1.9 down    |
| wnt1 responsive cdc42 homolog; wrch1-pending                                    | 1.9 up      |
| ring finger protein 2                                                           | 1.9 up      |
| growth arrest and dna-damage-inducible 45 beta; gadd45b                         | 2.2 up      |
| cyclin-dependent kinase inhibitor 2d (p19, inhibits cdk4); cdkn2d <sup>tm</sup> | 2.3 up      |
| Apoptosis                                                                       |             |
| Description                                                                     | Fold        |
| serum/glucocorticoid regulated kinase; sgk                                      | 3.5 down    |
| bcl2-like; bcl2l                                                                | 2.8 down    |
| bcl2-like 10; bcl2l10                                                           | 2.5 down    |
| chloride channel calcium activated 2; clca2                                     | 2.2 down    |
| b-cell leukemia/lymphoma 6; bcl6                                                | 1.9 down    |
| growth arrest specific 2; gas2                                                  | 1.9 down    |
| bcl-2-related ovarian killer protein-like; bok                                  | 1.9 down    |
| neuronal apoptosis inhibitory protein 1; birc1a                                 | 1.9 up      |
| fibrinogen/angiopoietin-related protein; angptl4                                | 1.9 up      |
| tumor differentially expressed 1; tde1                                          | 2.0 up      |
| growth arrest and dna-damage-inducible 45 beta; gadd45b                         | 2.2 up      |
| protein-serine/threonine kinase; pim-2                                          | 2.2 up      |
| protein-tyrosine kinase (ec 2.7.1.112)                                          | 2.4 up      |
