# Supplementary material
Source: PubMed Central journal article supplement (PMC1560357)

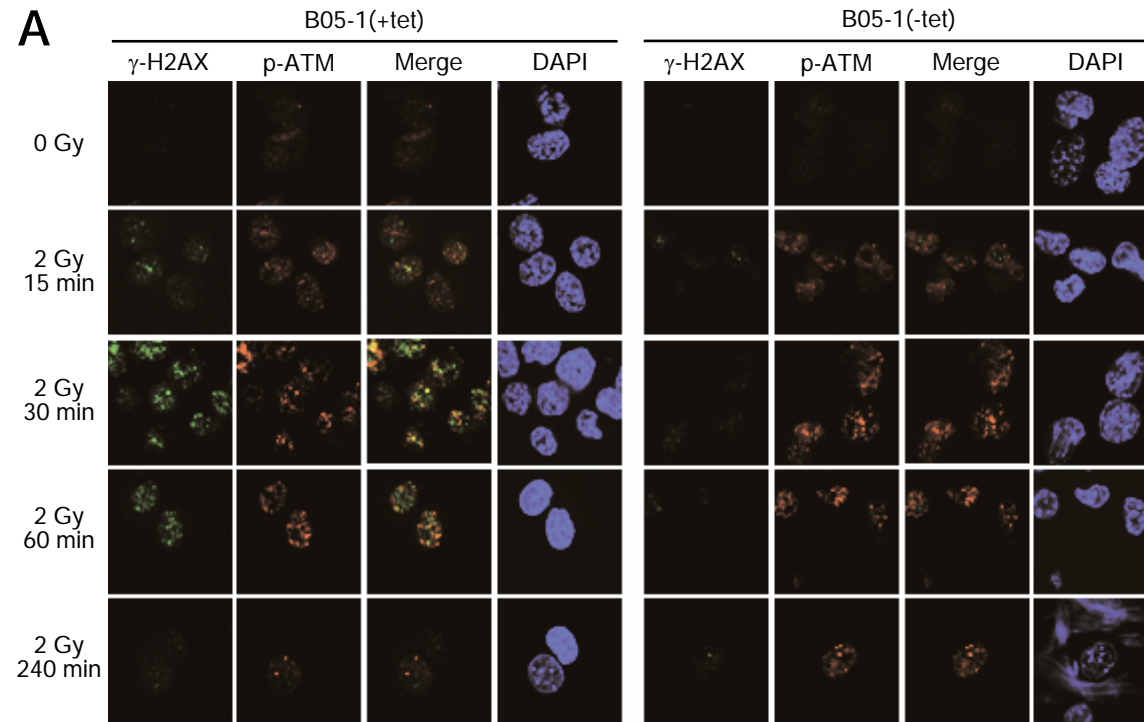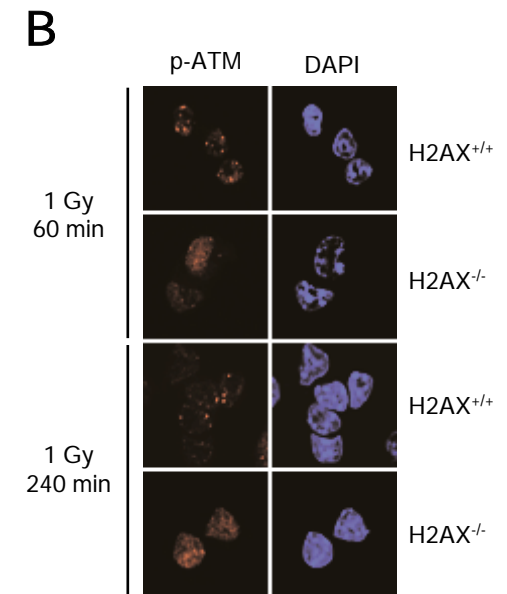

Supplement: 7601291s1.pdf [file 7601291s1.pdf]

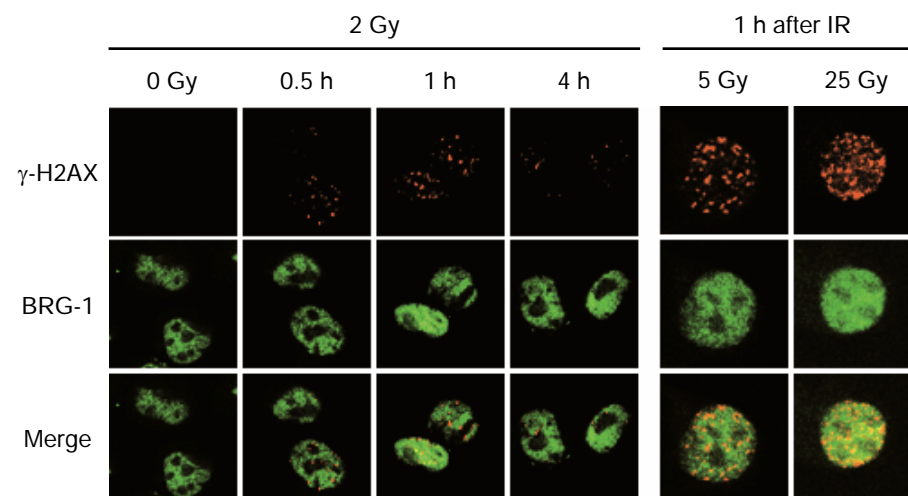

Supplement: 7601291s2.pdf [file 7601291s2.pdf]
